# Supplementary material
Source: Research Square preprint supplement (doi:10.21203/rs.3.rs-9513069/v1)
Supplement: Supplementary file 1 [file fa3122341f129e431c39b887.docx]

**Supplementary Materials**

**
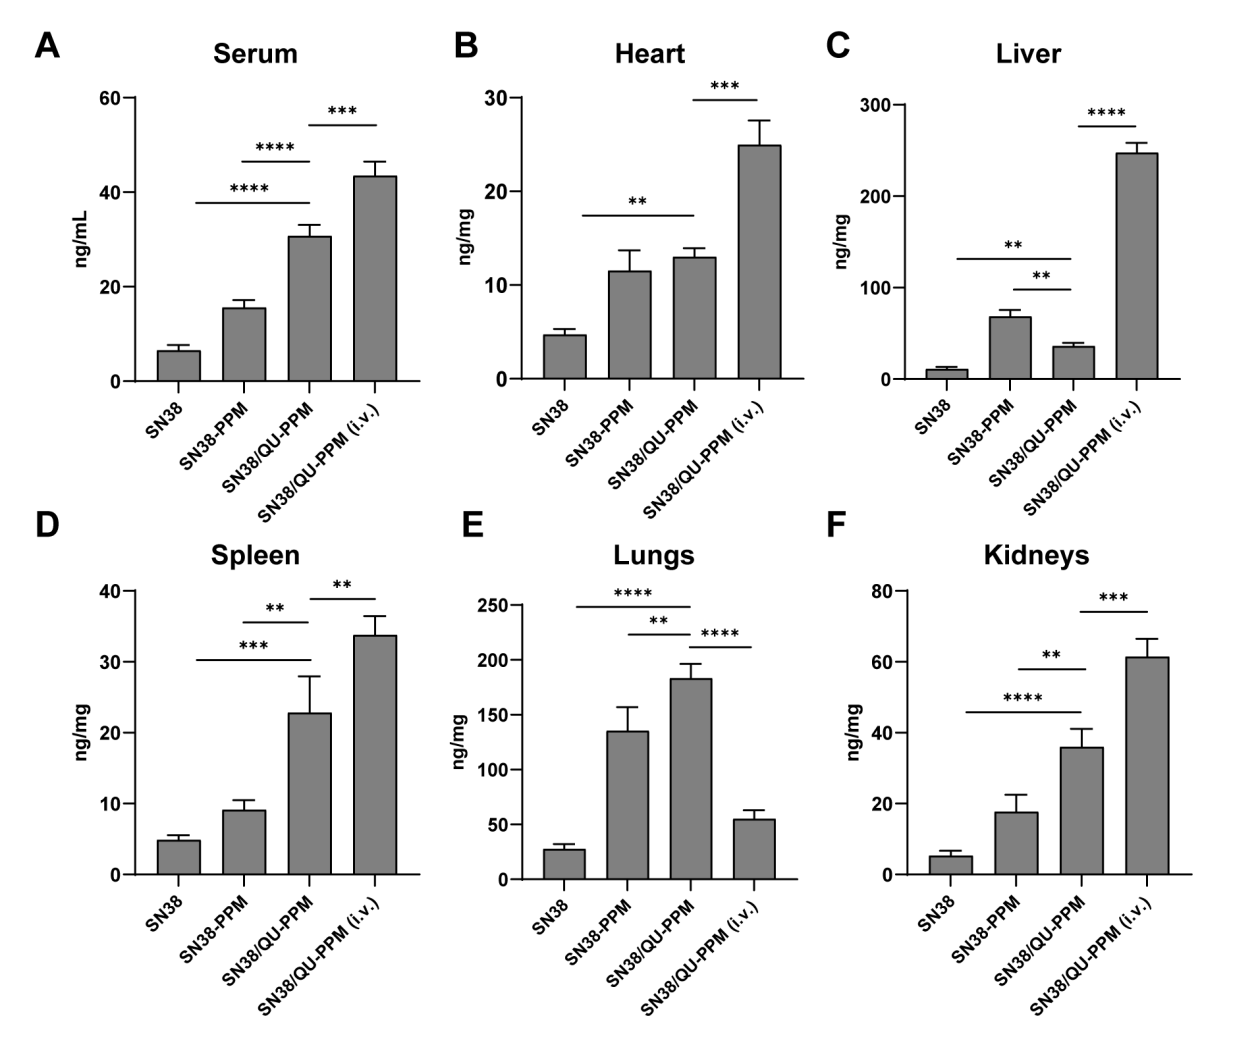
**

**Figure S1.** SN38 concentrations in mouse serum and major organs following different treatment methods (n = 3, mean ± SD, **P < 0.01, ***P < 0.001 and ****P < 0.0001).

**
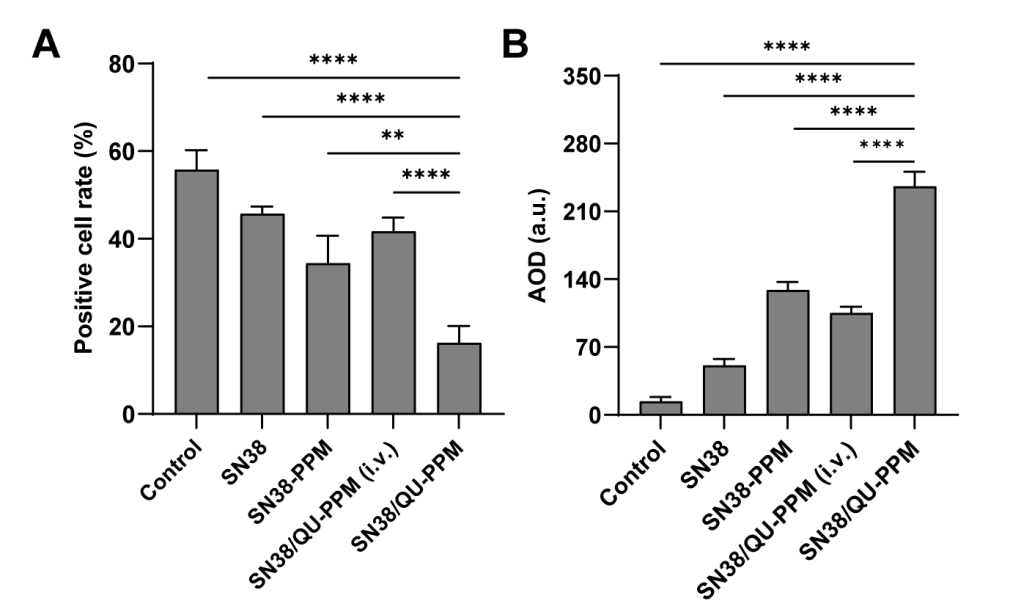
**

**Figure S2.** (**A**) Quantitative analysis of Ki-67-positive cell rate. (**B**) AOD quantification of TUNEL staining. (n = 3, mean ± SD, **P < 0.01, ****P < 0.0001).

**
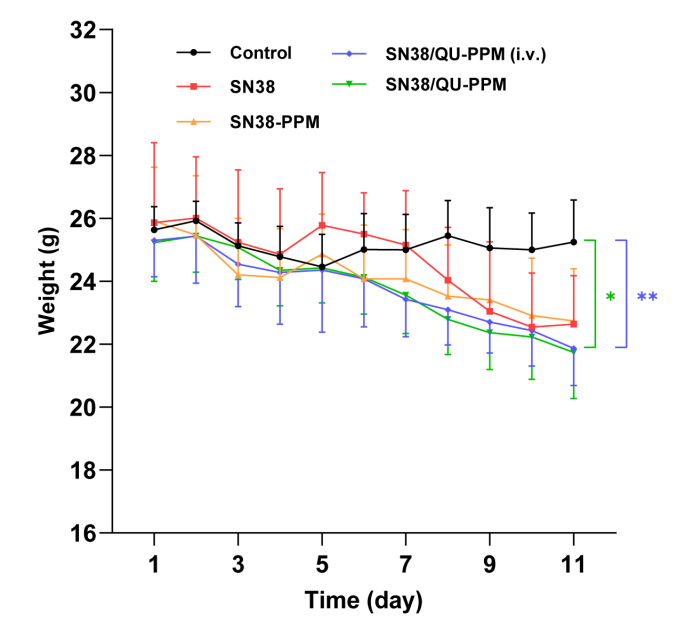
**

**Figure S3.** Body weight of mice after different treatments (n = 6, mean ± SD, *P < 0.05, **P < 0.01).


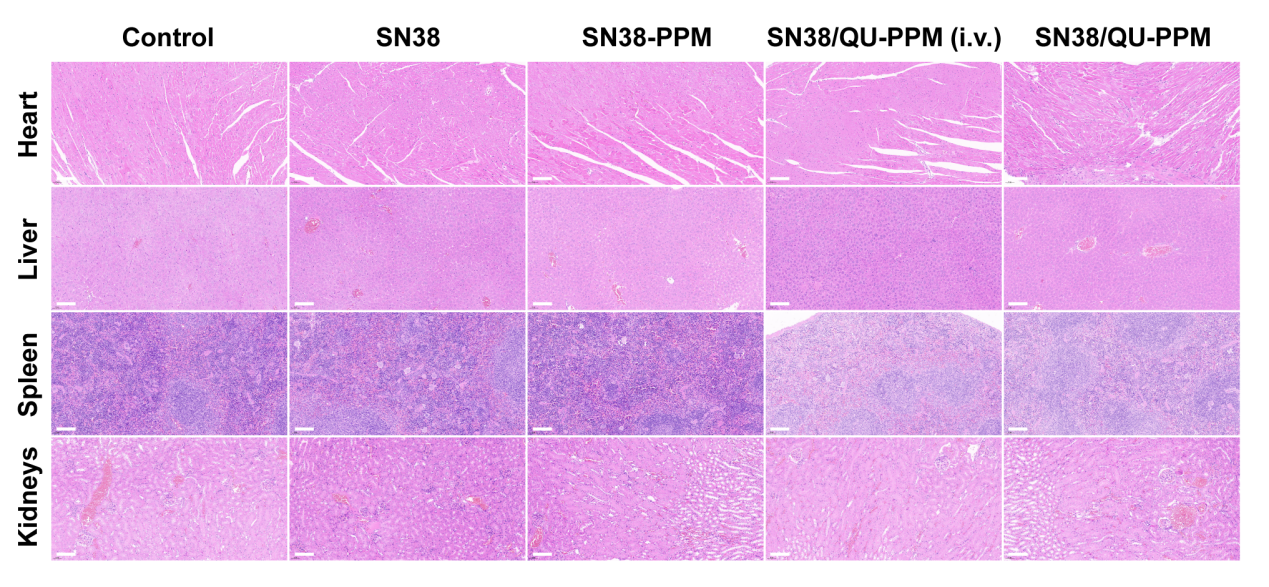


**Figure S4.** H&E staining of major organs after treatment. Scale bar: 100 nm.


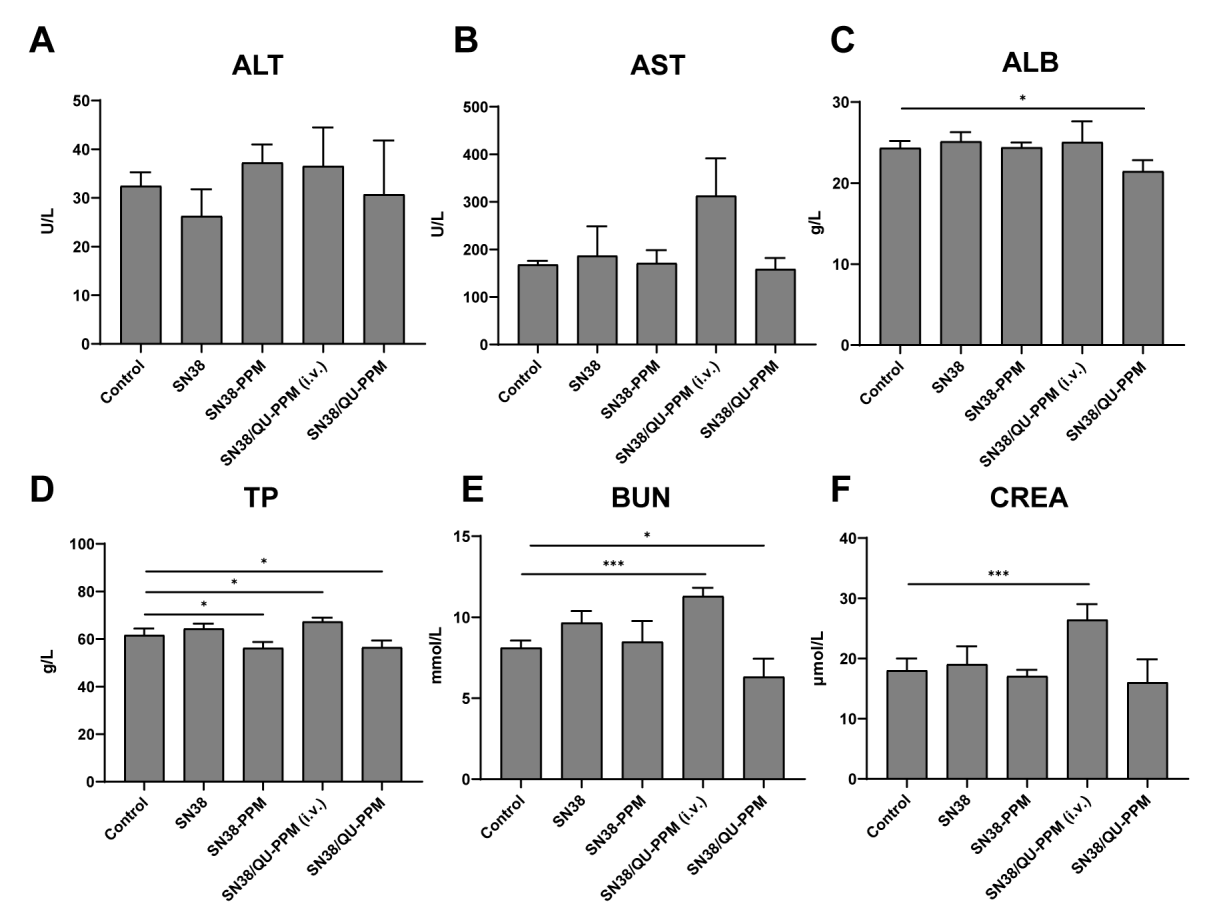


**Figure S5.** (**A**) Alanine aminotransferase (ALT), (**B**) aspartate aminotransferase (AST), (**C**) albumin (ALB), (**D**) total protein (TP), (**E**) blood urea nitrogen (BUN), and (**F**) creatinine (CREA) levels were measured in the serum of mice after different treatments (n = 5, mean ± SD, *P < 0.05, ***P < 0.001).

**Table S1.** Particle size, zeta potential and PDI of PPM, SN38-PPM and SN38/QU-PPM.

|  | **Particle size (nm)** | **Zeta potential (mV)** | **PDI** |
| --- | --- | --- | --- |
| PPM | 120.37±16.24 | -16.49±0.22 | 0.119±0.005 |
| SN38-PPM | 138.87±15.37 | -14.47±0.42 | 0.119±0.009 |
| SN38/QU-PPM | 130.57±25.38 | -15.26±0.59 | 0.115±0.017 |
